# Supplementary material for: Multiplex relative quantitation of peptides and proteins using amine-reactive metal element chelated tags coupled with mass spectrometry
Source: Royal Society of Chemistry journal article supplement (doi:10.1039/c2ay25275a), 2012-01-01
Supplement: c2ay25275a.pdf [file c2ay25275a.pdf]

# **Multiplex relative quantitation of peptides and proteins using amine-reactive metal element chelated tags coupled with mass spectrometry**

**Xin Wang, Yangjun Zhang<sup>\*</sup>, Xueying Wang, Hongjun Lin, Weijie Qin, Xiaohong Qian<sup>\*</sup>**

<sup>\*</sup>Corresponding author: E-mail: zhangyangjun6314@yahoo.com.cn (Yangjun Zhang);

qianxh1@163.com (Xiaohong Qian). Fax: (+) 86 80705155

## Electronic Supporting Information

Table S1 The synthetic peptides selected to verify the labeling efficiency in our paper.

| No. | Sequence of peptides | m/z     | PI   | Value of<br>hydrophobicity | m/z<br>(DOTA-P) | m/z<br>(Tb-DOTA-P) |
|-----|----------------------|---------|------|----------------------------|-----------------|--------------------|
| 1   | AGYTAIVSHR           | 1074.57 | 8.8  | 0.14                       | 1460.75         | 1616.65            |
| 2   | LAELEAALQR           | 1113.63 | 4.53 | 0.18                       | 1499.81         | 1655.71            |
| 3   | VLDGAVSEDGR          | 1117.55 | 4.03 | -0.236                     | 1503.73         | 1659.63            |
| 4   | GFYIYQEGSK           | 1191.57 | 6.00 | -0.78                      | 1963.93         | 2275.73            |
| 5   | GNLGAGNGNLQGPR       | 1324.67 | 9.75 | -0.907                     | 1710.85         | 1866.75            |
| 6   | NQNSWGTGEDVK         | 1334.60 | 4.37 | -1.7                       | 2106.96         | 2418.76            |
| 7   | TATVDDIDNIYR         | 1395.68 | 3.93 | -0.517                     | 1781.85         | 1937.76            |
| 8   | AFPAWADTSILSR        | 1434.74 | 5.88 | 0.285                      | 1820.92         | 1976.82            |
| 9   | TLTDEEVNEVHAR        | 1512.73 | 4.40 | -0.969                     | 1898.91         | 2054.81            |
| 10  | SYVYGPIPTFDR         | 1551.76 | 6.46 | -0.569                     | 1937.94         | 2093.84            |

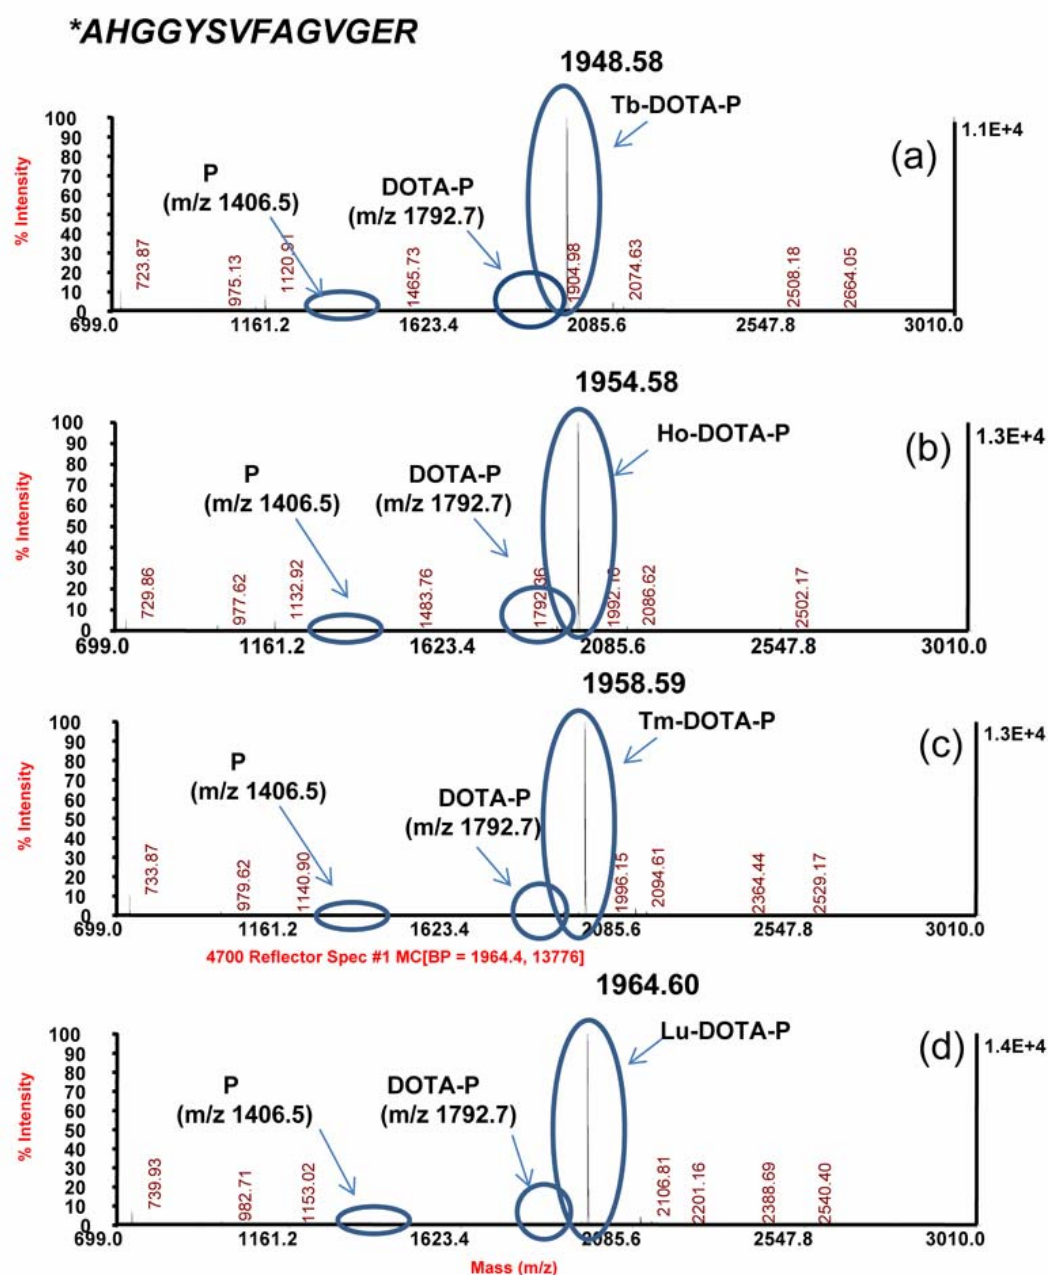

Figure S1 MALDI-TOF MS spectra of M-DOTA-AHGGYSVFAGVGER (Tb(a), Ho (b), Tm (c) and Lu (d) respectively) dissolving in 0.1% TFA at 4°C for 24h. The metal tag is indicated by an asterisk incorporating at the N-terminus.

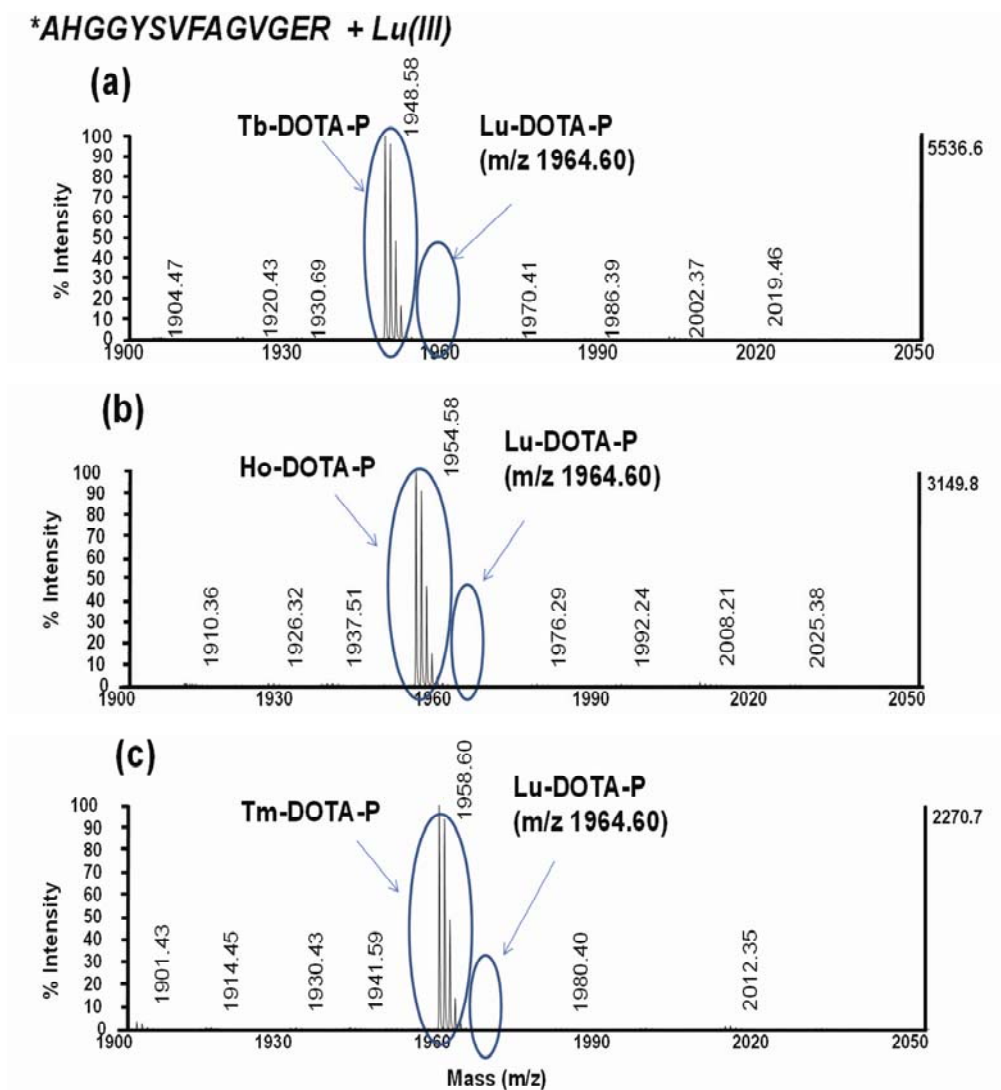

Figure S2 MS analysis of the reaction solutions of Tb-DOTA-AHGGYSVFAGVGER (a), Ho-DOTA-AHGGYSVFAGVGER(b) and Tm-DOTA-AHGGYSVFAGVGER (c) incubating with 2 equivalents LuCl<sub>3</sub> solution at 37 °C for 1h. The metal tag is indicated by an asterisk incorporating at the N-terminus of the peptide AHGGYSVFAGER.

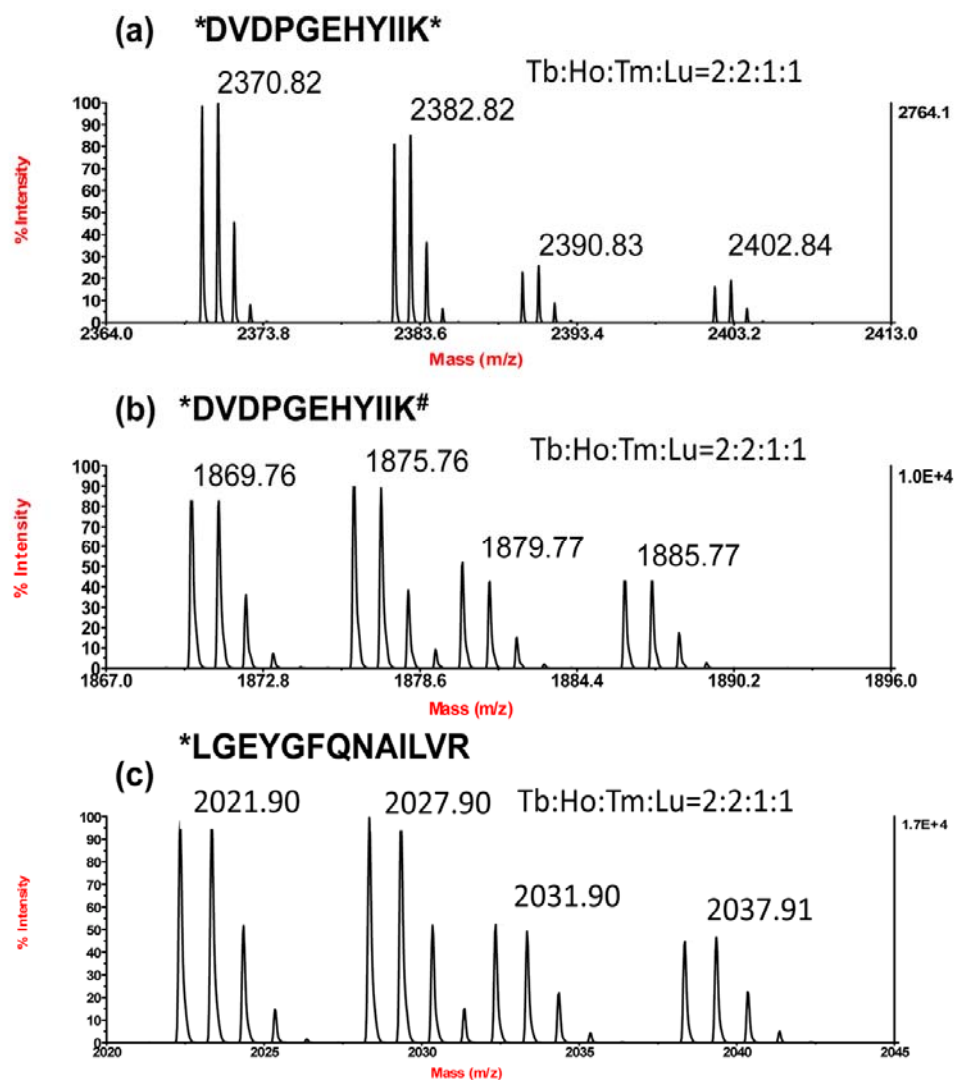

Figure S3 MALDI-MS spectra of the Tb-, Ho-, Tm- and Lu-plex MECT labeled peptides at molar ratio of 2:2:1:1. The panel(a), (b) and (c) are the spectra of peptide DVDPGEHYIIK, its K-guanidinated counterpart and the control peptide LGEYGFQNAILVR, respectively. “#” indicates the guanidination of  $\epsilon$ - amino group of lysine; “\*” indicates the MECT tag.

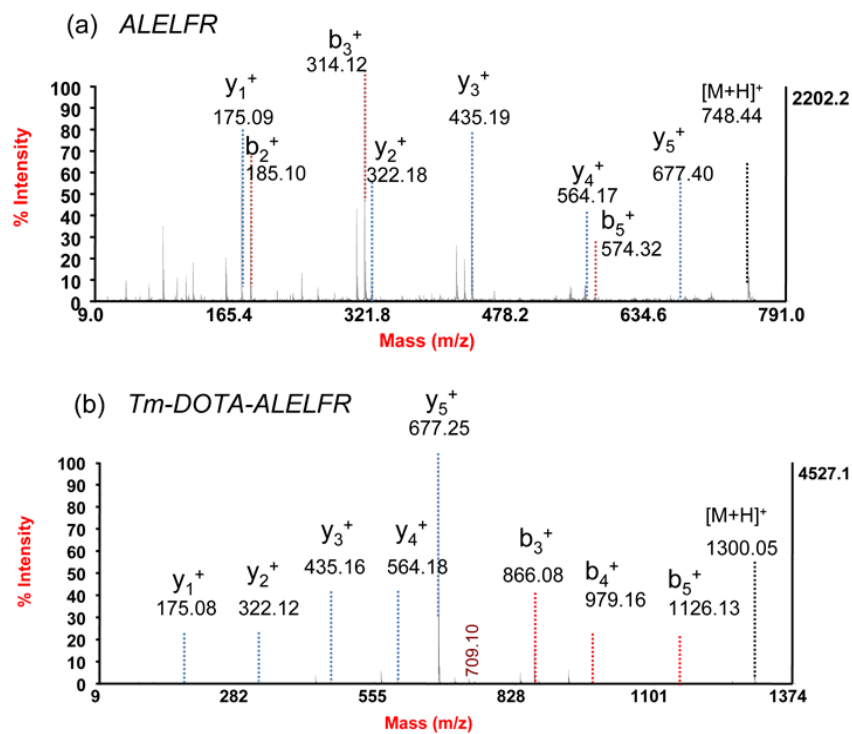

Figure S4 The CID fragments of the peptide ALELFR (a) and its Tm-MECT labeled peptide (b) in MALDI-MS/MS.

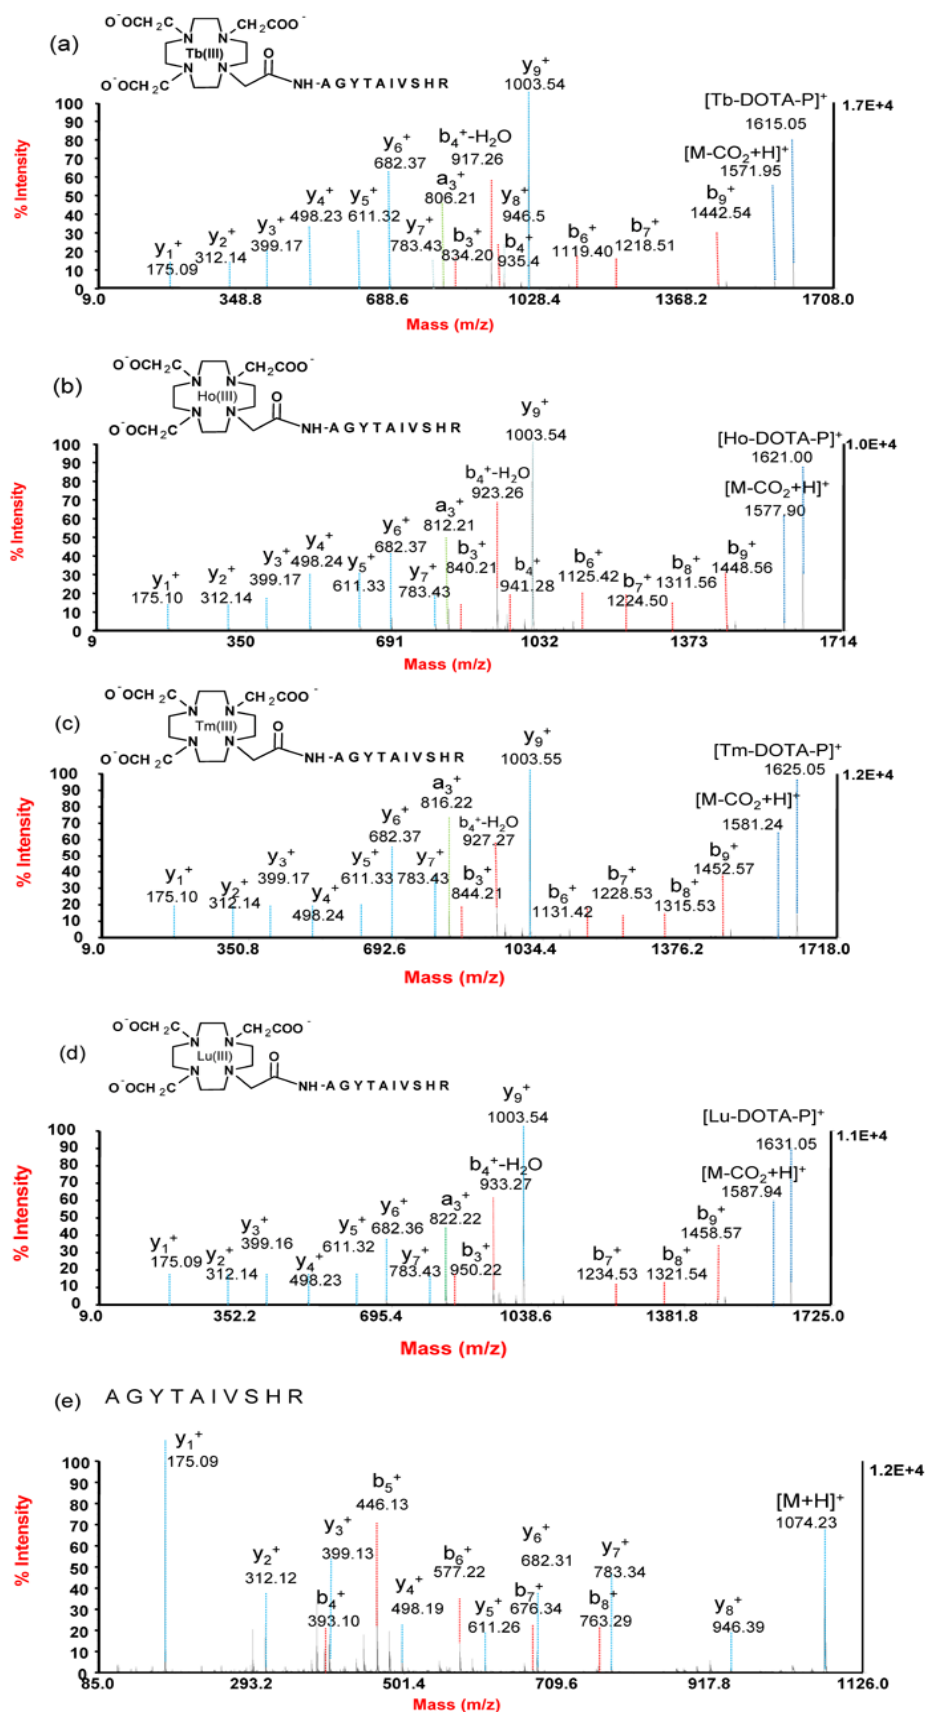

Figure S5 The CID fragments of the Tb, Ho-, Tm-, Lu-labeled peptides AGYTAIVSHR and its counterpart-in MALDI-MS/MS.
